# Supplementary material
Source: PubMed Central journal article supplement (PMC4775140)
Supplement: supp_pp.15.01859_PP2015-01859DR1_Supplemental_Materialfig1.pdf [file supp_pp.15.01859_PP2015-01859DR1_Supplemental_Materialfig1.pdf]

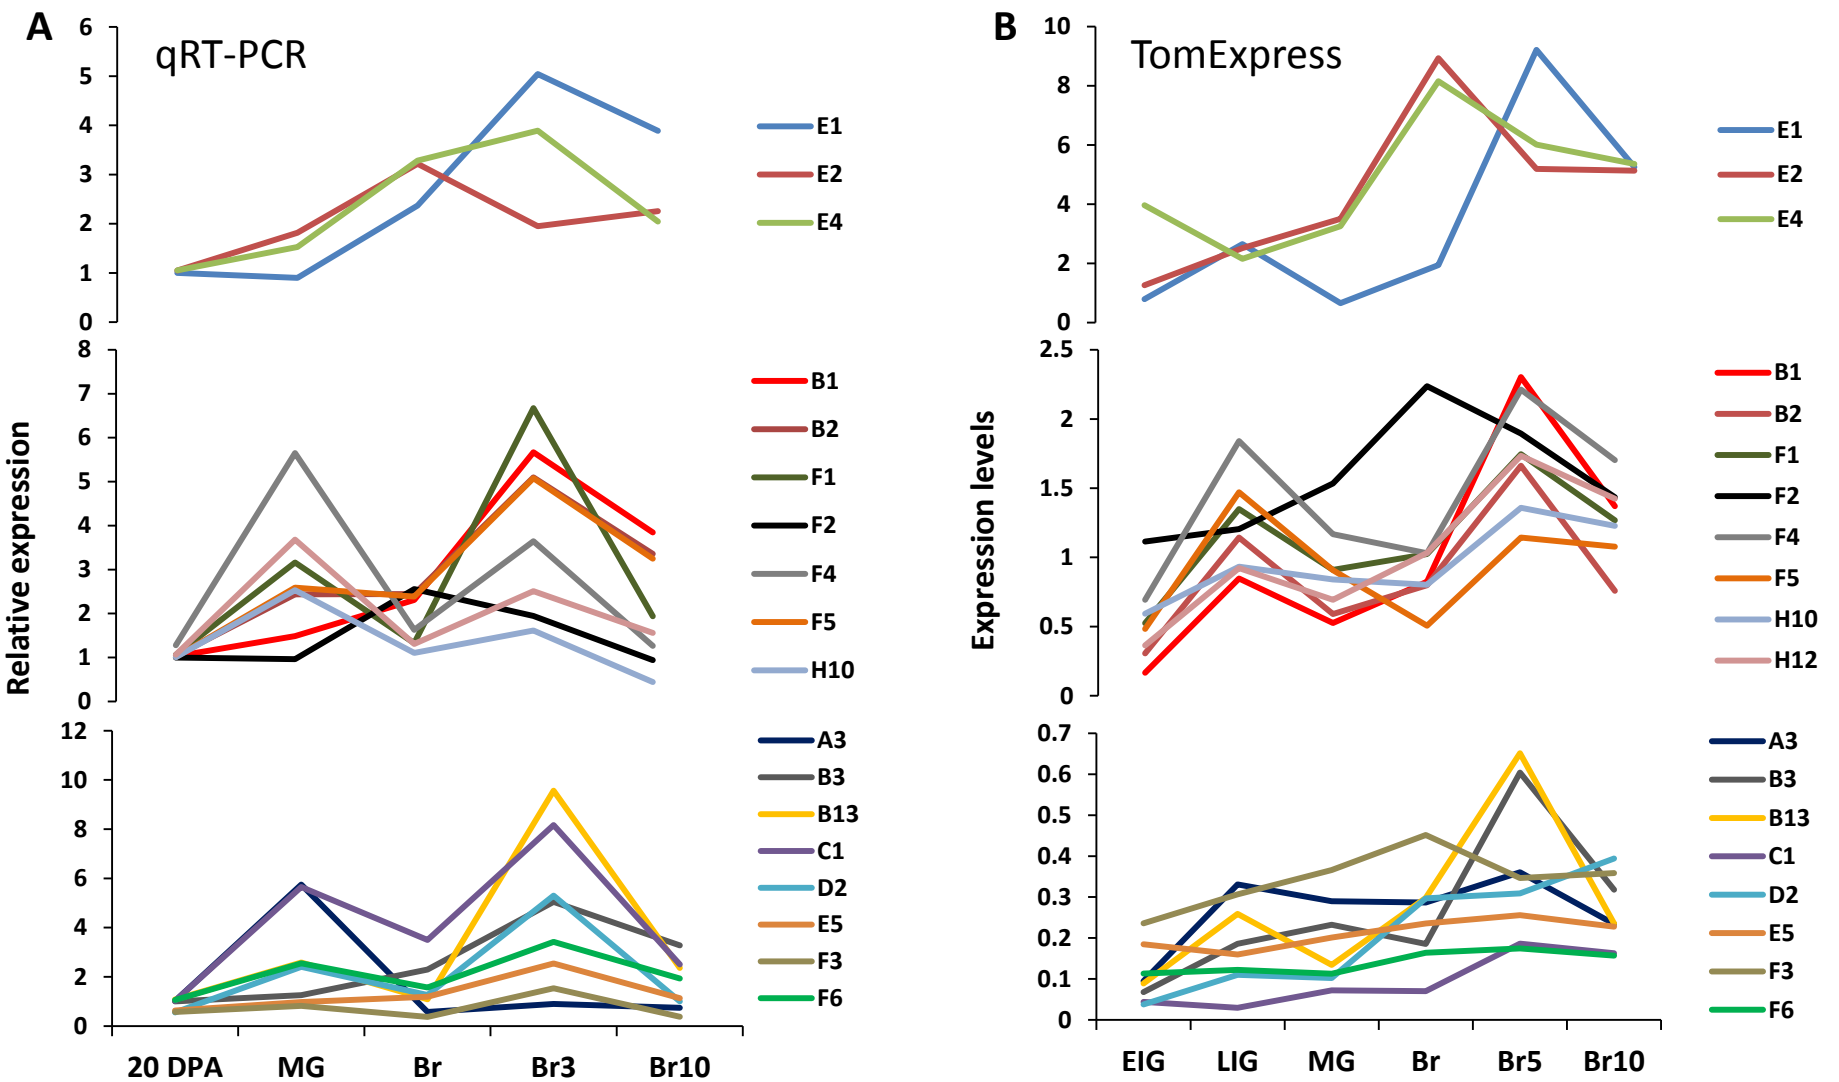

**Figure S1.** Quantitative RT-PCR results confirm the expression data of ERF genes obtained from the TomExpress platform. Panel A shows relative expression of ERFs during fruit developmental stages and ripening process in wild type assessed by qRT-PCR. The relative expression of each ERF gene at the 20 days post-anthesis (20 DPA) stage is standardized to 1 (referring to the SI-Actin gene as an internal control). Panel B shows expression data obtained from the TomExpress platform developed by the GBF laboratory (from all available RNA-Seq data sets of Tomato transcriptome analyses). For each gene, the expression represents the mean of normalized counts of all tomato cultivars contained in TomExpress. Graphs in B are separated by scale. EIG, Early immature green; LIG, Late immature green; MG, Mature green; Br, Breaker; Br3, 3 days post-breaker; Br5, 5 days post-breaker; Br10, 10 days post-breaker.
