# Supplementary material
Source: PubMed Central journal article supplement (PMC4775140)
Supplement: supp_pp.15.01859_PP2015-01859DR1_Supplemental_Materialfig2.pdf [file supp_pp.15.01859_PP2015-01859DR1_Supplemental_Materialfig2.pdf]

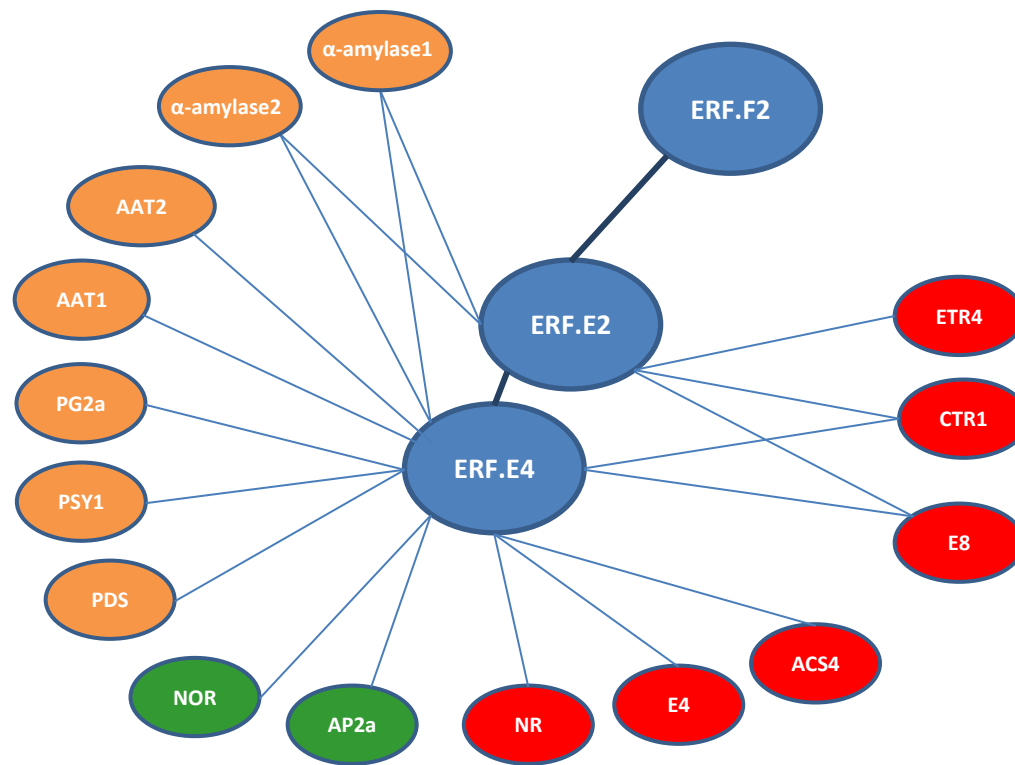

**Fig S2.** Correlation network of ERFs and ripening-associated genes. The network was generated from the analysis of co-expressions of ERFs and ripening-related genes in the TomExpress platform (with a correlation threshold > 0.85). ERF genes are shown as blue ovals, ethylene-related genes are shown as red ovals, ripening regulators are shown as green ovals, and genes encoding enzymes involved in fruit development and ripening are shown as orange ovals. ACS4, aminocyclopropane-1-carboxylic acid synthases; E4, E8, ethylene response genes; CTR1, ethylene signaling component; NR, ETR4, ethylene receptors; AP2a, NOR, ripening regulators; PSY1, phytoene synthase; PDS, phytoene desaturase; PG2a, polygalacturonase; AAT, alcohol acyltransferase.
